# Supplementary material for: Construction of Escherichia coli strains with chromosomally integrated expression cassettes for the synthesis of 2′-fucosyllactose
Source: PubMed Central journal article supplement (PMC3655002; doi:10.1186/1475-2859-12-40), 2013-05-01
Supplement: 1475-2859-12-40-S1.pdf [file 1475-2859-12-40-S1.pdf]

Table S1: Primer list

| Primer     | Sequence                                                                                     | PCR-template                                            | PCR-product                                                                                                                                 |
|------------|----------------------------------------------------------------------------------------------|---------------------------------------------------------|---------------------------------------------------------------------------------------------------------------------------------------------|
| malEFG-for | AAGGTAAACTGGTAATCTGGATTAACGGCGATAAAAGG<br>CTATAACGGTCTCGCTGTCAAGGCGCACTCCCGTTCTG<br>G        | pJF-futC-FRT-<br>cat-FRT                                | P <sub>tac</sub> - <i>futC</i> -FRT-cat-<br>FRT for the<br>replacement of<br><i>malEFG</i>                                                  |
| malEFG-rev | GATCGGTAATGCAGACATCACGGCAGCGGGCAGAAA<br>GTCACCCACAGGTAGTTTTAGGGTTATTGTCTCATG<br>AGCG         |                                                         |                                                                                                                                             |
| fucIK-for  | CCGAATAAAGTGAGGAATCTGTAATGAAAAAATCA<br>GCTTACCAGAAAATTGGTCAAGGCGCACTCCCGTTCTG<br>G           | pJF-futC-FRT-<br>cat-FRT or pJF-<br>fkp-FRT-cat-<br>FRT | P <sub>tac</sub> - <i>futC</i> -FRT-cat-<br>FRT or P <sub>tac</sub> - <i>fkp</i> -FRT-<br>cat-FRT<br>for the<br>replacement of <i>fucIK</i> |
| fucIK-rev  | GTTAACCCCTCCAGCGCCGCGGATAGAAATGCCCC<br>GCGTGGTATTAAGCAGGGTTATTGTCTCATGAGCG                   |                                                         |                                                                                                                                             |
| xylAB-for  | GACGAACTGGTGTGGGTAAGCGTATGGAAGAGCACT<br>TGCGTTTTGCCGCTGCTCAAGGCGCACTCCCGTTCTG<br>G           | pJF-gmdwcaG<br>FRT-cat-FRT                              | P <sub>tac</sub> - <i>gmdwcaG</i> -FRT-<br>cat-FRT<br>for the replacement<br>of <i>xylAB</i>                                                |
| xylAB-rev  | ATTAAGCTGGGACATTGCTCAGGCCGGTTAATTCG<br>CGGCCAATCCAGACACCAGGGTTATTGTCTCATGAG<br>CG            |                                                         |                                                                                                                                             |
| rbsDK-for  | ACCGTTCCTAATTCTGATATTCATCGGTGATCTCCCG<br>TCTGGGACATACCGATATGCATGCATCGATCACCACA<br>ATT        | pJF-manC-FRT-<br>kan-FRT                                | P <sub>tac</sub> - <i>manC</i> -FRT-kan-<br>FRT<br>for the replacement<br>of <i>rbsDACBK</i>                                                |
| rbsDK-rev  | ATTCACGCTAGCCCATACACCACGACTTCTAAAGTA<br>ATCAGTACAGTACGGATAACC<br>CAGGGTTATTGTCTCATGAGCGGATAC |                                                         |                                                                                                                                             |
| melAB-for  | CGGCGCATATTGCCCTGATGGACATTGACCCACCCG<br>CCTGGAAGAGTCGCATATTGTTCAAGGCGCACTCCCG<br>TTCTGG      | pJF-manB-FRT-<br>cat-FRT                                | P <sub>tac</sub> - <i>manB</i> -FRT-cat-<br>FRT for the<br>replacement of<br><i>melAB</i>                                                   |
| melAB-rev  | AGCGCAACGATGGCTTTAAGTGTCAGATGGCTTCCTT<br>CAGCAGACGGTTGATTGTCTGCAGGGTTATTGTCTCAT<br>GAGCG     |                                                         |                                                                                                                                             |
| araBAD-for | TCTATAATCACGGCAGAAAAGTCCACATTGATTATTT<br>GCACGGCGTCGCTCAAGGCGCACTCCCGTTCTGG                  | pJF-fkp-FRT-<br>cat-FRT                                 | P <sub>tac</sub> - <i>fkp</i> -FRT-cat-FRT<br>for the<br>replacement of<br><i>araBAD</i>                                                    |
| araBAD-rev | ATATAAGCGACCTCTTCCAGCACGATGGCGTTATGCA<br>CCGCATCTCCGTCAGGATGGCCTTCTGCTTAATTGA<br>TGCC        |                                                         |                                                                                                                                             |
