# Supplementary material for: Construction of Escherichia coli strains with chromosomally integrated expression cassettes for the synthesis of 2′-fucosyllactose
Source: PubMed Central journal article supplement (PMC3655002; doi:10.1186/1475-2859-12-40), 2013-05-01

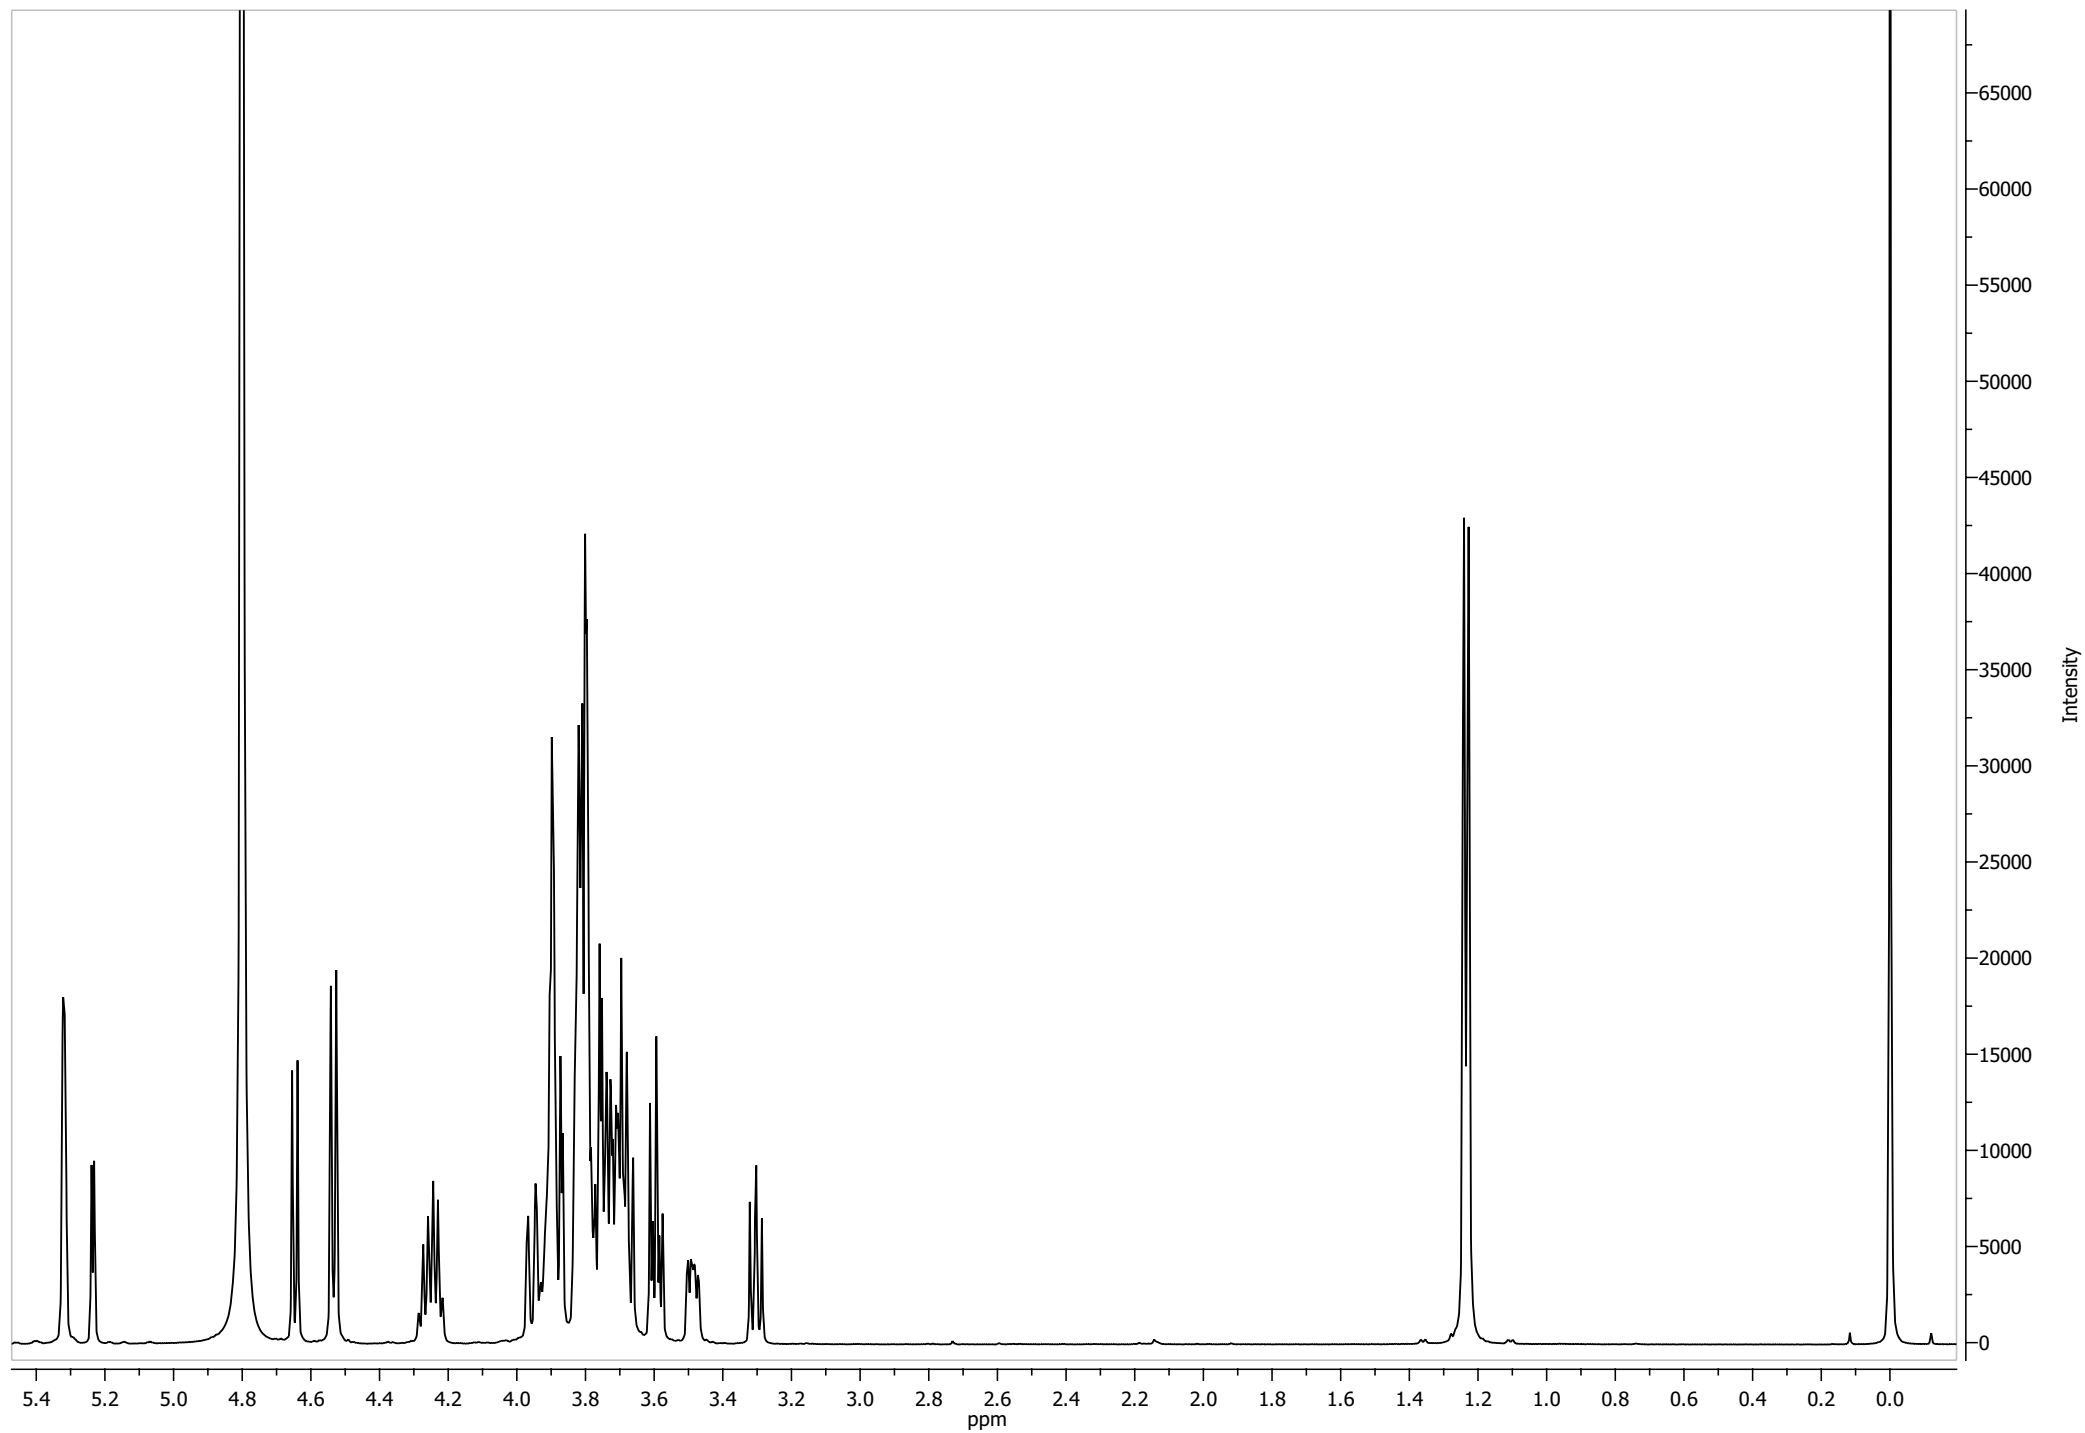

Supplement: 1475-2859-12-40-S2.pdf [file 1475-2859-12-40-S2.pdf]
